# Supplementary material
Source: publisher figshare collection journal article supplement (https://tandf.figshare.com/articles/dataset/_/5919472)
Supplement: Supplementary file 1 [file 1 › Assessment Instruments.docx]

**SUPPLEMENTAL MATERIAL – Moss et al, submitted to Journal of Geoscience Education**

**SUSSI**

**Views on Science and Scientific Inquiry**

Please read EACH statement carefully, and then indicate the degree to which you agree or disagree with EACH statement by circling the appropriate choice to the right of each statement.

SD = Strongly Disagree

D = Disagree More Than Agree

U = Uncertain or Not Sure

A = Agree More Than Disagree

SA = Strongly Agree

1. Scientific Observations

| A. | Scientists’ observations of the same event may be different because the scientists’ prior knowledge may affect their observations. | SD | D | U | A | SA |
| --- | --- | --- | --- | --- | --- | --- |
| B. | Scientists’ observations of the same event will be the same because scientists are unbiased. | SD | D | U | A | SA |
| C. | Scientists’ observations of the same event will be the same because observations are facts. | SD | D | U | A | SA |
| D. | Scientists may make different interpretations based on the same observations. | SD | D | U | A | SA |
| Explain why you think scientists’ observations and interpretations are the same OR different, and **provide examples to support your answer**. | | | | | | |

2. Social and Cultural Influences on Science

| A. | Scientific research is not influenced by society and culture because scientists are trained to conduct pure, unbiased studies. | SD | D | U | A | SA |
| --- | --- | --- | --- | --- | --- | --- |
| B. | Cultural values and expectations influence whatscience is conducted and accepted. | SD | D | U | A | SA |
| C. | Cultural values and expectations influence how science is conducted and accepted. | SD | D | U | A | SA |
| D. | All cultures conduct scientific research the same way because science is universal and independent of society and culture. | SD | D | U | A | SA |
| Explain how society and culture affect OR do not affect scientific research, and **provide examples to support your answer**. | | | | | | |

3. Imagination and Creativity in Scientific investigations

| A. | Scientists use their imagination and creativity when they collect data. | SD | D | U | A | SA |
| --- | --- | --- | --- | --- | --- | --- |
| B. | Scientists use their imagination and creativity when they analyze and interpret data. | SD | D | U | A | SA |
| C. | Scientists do **not** use their imagination and creativity because these conflict with their logical reasoning. | SD | D | U | A | SA |
| D. | Scientists do **not** use their imagination and creativity because these can interfere with the need to be unbiased. | SD | D | U | A | SA |
| Explain why scientists use OR do not use imagination and creativity, and **provide examples to support your answer**. | | | | | | |

4. Methodology of Scientific Investigations

| A. | Considering what scientists actually do, there really is no such thing as the scientific method. | SD | D | U | A | SA |
| --- | --- | --- | --- | --- | --- | --- |
| B. | Scientists follow the same step-by-step scientific method. | SD | D | U | A | SA |
| C. | When scientists use the scientific method correctly, their results are true and accurate. | SD | D | U | A | SA |
| D. | Experiments are the only way scientists develop valid scientific knowledge when they investigate the natural world. | SD | D | U | A | SA |
| Explain whether scientists follow a single, universal scientific method OR use different types of methods, and **provide examples to support your answer**. | | | | | | |

5. Social Interaction among Scientific Researchers

| A. | Scientists usually work collaboratively with other scientists when conducting research. | SD | D | U | A | SA |
| --- | --- | --- | --- | --- | --- | --- |
| B. | Scientists usually work with other scientists, but only to share results. | SD | D | U | A | SA |
| C. | Scientists usually work alone when conducting research. | SD | D | U | A | SA |
| D. | Scientific knowledge usually emerges from discussions and social interactions among scientists. | SD | D | U | A | SA |
| Explain to what degree scientists work with other scientists when doing research, and **provide examples to support your answer**. | | | | | | |

6. Development and Acceptance of Science Ideas

| A. | Credible scientific ideas are usually generated in a matter of days, weeks or months. | SD | D | U | A | SA |
| --- | --- | --- | --- | --- | --- | --- |
| B. | Scientific ideas usually come to be accepted by the scientific community in a matter of days, weeks or months. | SD | D | U | A | SA |
| C. | Credible scientific ideas are usually generated over a period of years to decades. | SD | D | U | A | SA |
| D. | Scientific ideas usually come to be accepted by the scientific community over a period of years to decades. | SD | D | U | A | SA |
| Explain how much time is usually required for credible scientific ideas to be generated, and then accepted by the scientific community, and **provide examples to support your answer**. | | | | | | |

7. Scientific Knowledge

| A. | Well supported and established scientific knowledge is subject to on-going testing and revision. | SD | D | U | A | SA |
| --- | --- | --- | --- | --- | --- | --- |
| B. | Well supported and established scientific knowledge may be completely replaced by new ideas in light of new evidence. | SD | D | U | A | SA |
| C. | Well supported and established scientific knowledge may be changed because scientists reinterpret existing evidence. | SD | D | U | A | SA |
| D. | Well supported and established scientific knowledge based on accurate research will not change. | SD | D | U | A | SA |
| Explain why you think well supported and established scientific knowledge changes OR does not change over time, and **provide examples to support your answer**. | | | | | | |

8. Discovery and Invention

**In responding to the four items below, assume that a gold miner "discovers" gold while an author "invents" a story.**

| A. | Scientific theories (for example, atomic theory, plate-tectonic theory, gene theory) are discovered. | SD | D | U | A | SA |
| --- | --- | --- | --- | --- | --- | --- |
| B. | Scientific laws (for example, laws of planetary motion, gas laws, gravitational law, law of pendulum motion) are discovered. | SD | D | U | A | SA |
| C. | Scientific theories (for example, atomic theory, plate-tectonic theory, gene theory) are invented. | SD | D | U | A | SA |
| D. | Scientific laws (for example, laws of planetary motion, gas laws, gravitational law, law of pendulum motion) are invented. | SD | D | U | A | SA |
| Explain whether scientific laws and theories are invented OR discovered, and **provide examples to support your answer**. | | | | | | |

**SELF-EFFICACY INSTRUMENT**

On a scale from 1 to 10, 1 being "not able or not true at all" and 10 being "completely able or completely true," rate your answer to the following questions.

1. I have confidence in my ability to do science.

2. There are some tasks required by being a scientist that I cannot do well.

3. When my performance in science is poor, it is due to my lack of ability.

4. I doubt my ability to do science.

5. I have all the skills needed to perform science tasks very well.

6. Most people in my field can do science better than I can.

7. I am an expert at doing science.

8. My future in science is limited because of my lack of skills.

9. I am very proud of my science skills and abilities.

10. I feel threatened when others watch me work.
